# Supplementary material
Source: PubMed Central journal article supplement (PMC6115661)
Supplement: ASN.2018040365SupplementaryData1.pdf [file ASN.2018040365SupplementaryData1.pdf]

**Supplemental Table 1.** Association between decline in eGFR and risk of death by BP arm assignment, with adjustment for proteinuria as a continuous variable.

| % renal function decline | Intensive BP arm<br>Hazard ratio (95% CI) |              |                                  |                                  | Usual BP arm<br>Hazard ratio (95% CI) |              |                                  |                                  |
|--------------------------|-------------------------------------------|--------------|----------------------------------|----------------------------------|---------------------------------------|--------------|----------------------------------|----------------------------------|
|                          | N                                         | Death rate** | Unadjusted Model                 | Adjusted Model <sup>1</sup>      | N                                     | Death rate** | Unadjusted                       | Adjusted Model <sup>1</sup>      |
| <5%                      | 461                                       | 3.2          | 0.93<br>(0.78-1.13)              | 0.88<br>(0.73-1.07)              | 501                                   | 3.4          | 1.0<br>(Ref)                     | 1.0<br>(Ref)                     |
| 5-<20%                   | 289                                       | 3.0          | 0.88 <sup>a</sup><br>(0.71-1.10) | 0.80 <sup>a</sup><br>(0.64-0.99) | 234                                   | 3.9          | 1.16 <sup>a</sup><br>(0.93-1.44) | 1.04 <sup>a</sup><br>(0.83-1.30) |
| ≥20%                     | 86                                        | 4.3          | 1.31<br>(0.97-1.79)              | 1.14<br>(0.82-1.57)              | 89                                    | 5.5          | 1.74<br>(1.30-2.32)              | 1.31<br>(0.96-1.78)              |

<sup>1</sup>Model is adjusted for age, sex, race, baseline heart disease, baseline ACE inhibitor use, baseline eGFR category, baseline proteinuria, baseline mean arterial pressure, stratified by trial.

<sup>a</sup>Hazard ratios are statistically significantly different comparing strict and usual BP arms (p<0.05).

**Supplemental Table 2.** Sensitivity analysis of the association between percent decline in renal function in AASK and MDRD participants (using a 15% or 25% threshold) from time of randomization until month 3-4 and risk of death.

| Intensive BP arm (N=836)       |     |                                  |                                                    | Usual BP arm (N=824) |                                  |                                                    |
|--------------------------------|-----|----------------------------------|----------------------------------------------------|----------------------|----------------------------------|----------------------------------------------------|
| Percent renal function decline | N   | Unadjusted Hazard ratio (95%CI)  | Adjusted Model Hazard ratio <sup>1</sup> (95%CI)   | N                    | Unadjusted Hazard ratio (95%CI)  | Adjusted Model Hazard ratio <sup>1</sup> (95%CI)   |
| <5%                            | 461 | 0.93<br>(0.78-1.13)              | 0.87<br>(0.72-1.05)                                | 501                  | 1.0<br>(Ref)                     | 1.0<br>(Ref)                                       |
| 5-<15%                         | 221 | 0.82 <sup>a</sup><br>(0.64-1.04) | 0.72 <sup>a</sup><br>(0.56-0.92)                   | 179                  | 1.19 <sup>a</sup><br>(0.94-1.51) | 1.07 <sup>a</sup><br>(0.84-1.36)                   |
| ≥15%                           | 154 | 1.23<br>(0.95-1.58)              | 1.08<br>(0.83-1.39)                                | 144                  | 1.44<br>(1.13-1.85)              | 1.14<br>(0.88-1.47)                                |
| Percent renal function decline | N   | Unadjusted Hazard ratio (95%CI)  | Adjusted Model 1 Hazard ratio <sup>1</sup> (95%CI) | N                    | Unadjusted Hazard ratio (95%CI)  | Adjusted Model 1 Hazard ratio <sup>1</sup> (95%CI) |
| <5%                            | 461 | 0.93<br>(0.78-1.13)              | 0.87<br>(0.72-1.05)                                | 501                  | 1.0<br>(Ref)                     | 1.0<br>(Ref)                                       |
| 5-<25%                         | 324 | 0.93 <sup>a</sup><br>(0.76-1.15) | 0.81<br>(0.66-1.01)                                | 267                  | 1.20 <sup>a</sup><br>(0.98-1.48) | 1.02<br>(0.82-1.26)                                |
| ≥25%                           | 51  | 1.26<br>(0.85-1.85)              | 1.23<br>(0.83-1.83)                                | 56                   | 1.87<br>(1.32-2.66)              | 1.59<br>(1.11-2.28)                                |

<sup>1</sup>Model is adjusted for age, sex, race, baseline heart disease, baseline ACE inhibitor use, baseline eGFR category, baseline proteinuria category, baseline mean arterial pressure, stratified by trial.

<sup>a</sup>Hazard ratios are statistically significantly different comparing intensive and usual BP arms (p<0.05).
